# Supplementary material
Source: publisher site journal article supplement (https://www.dovepress.com/article/459953)
Supplement: Supplementary file 1 [file get_supplementary_file.php]

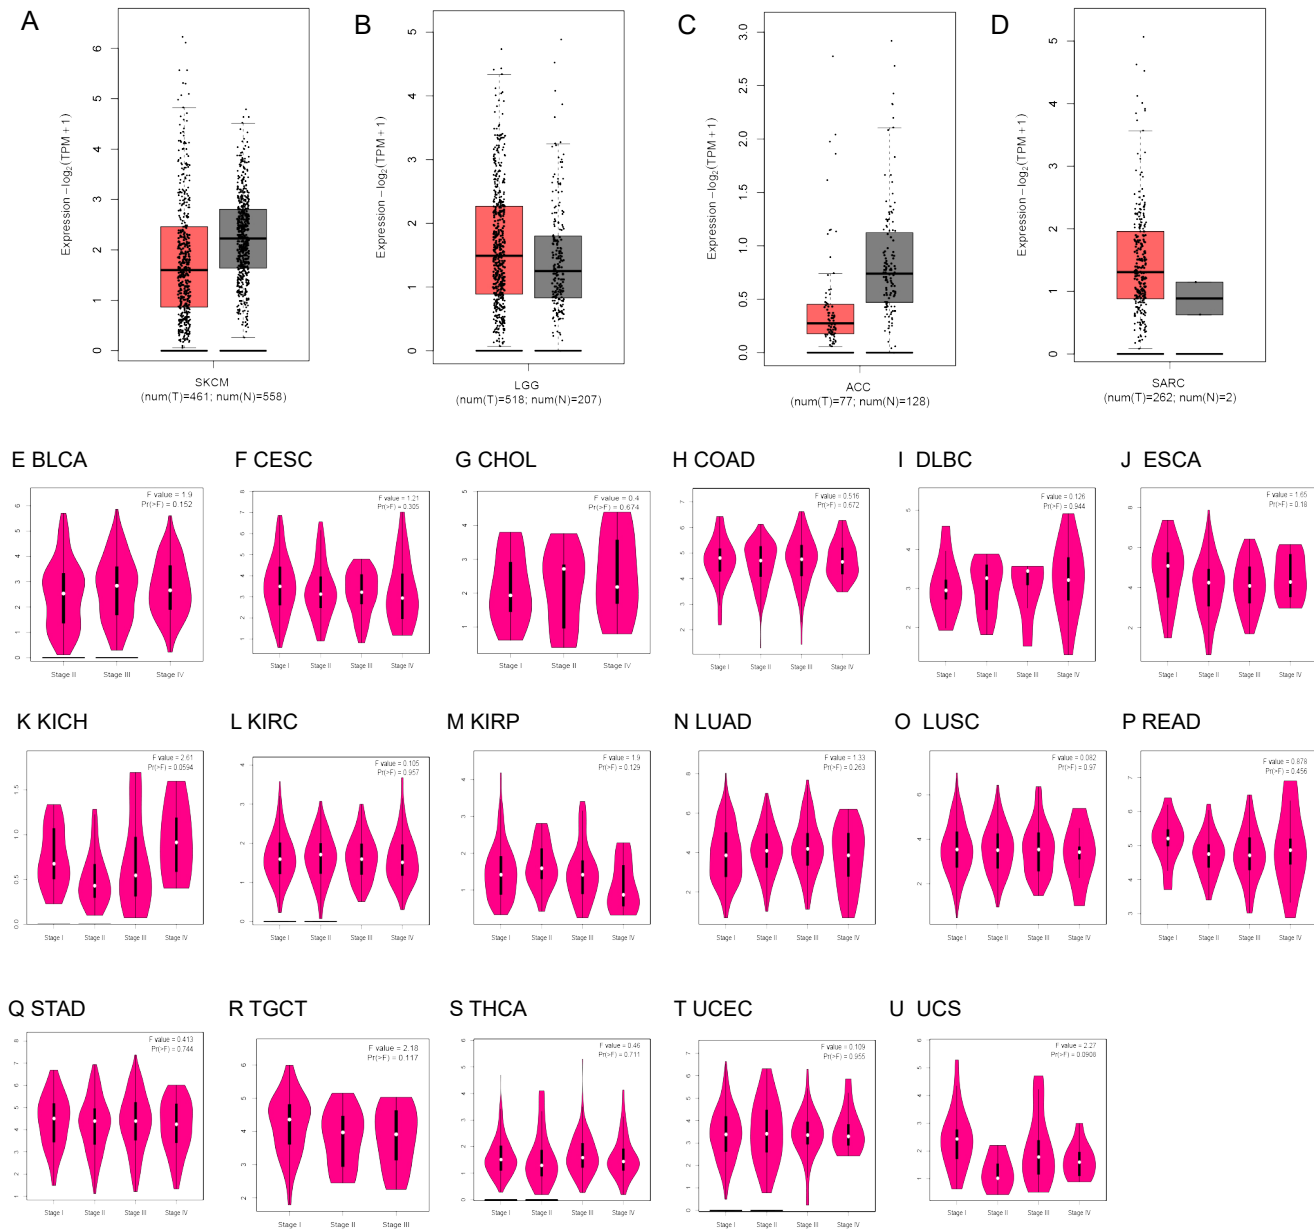

**FIGURE S1 | GALNT6 expression levels in various cancers.** Human GALNT6 expression levels in (A) SKCM, (B) LGG, (C) ACC, and (D) SARC, from TCGA and GTCx data in GEPIA2. GALNT6 gene expression in different pathological stages of (E) BLCA, (F) CESC, (G) CHOL, (H) COAD, (I) DLBCL, (J) ESCA, (K) KICH, (L) KIRC, (M) KIRP, (N) LUAD, (O) LUSC, (P) READ, (Q) STAD, (R) TGCT, (S) THCA, (T) THCA, and (U) UCS in GEPIA2.
